# Supplementary material
Source: publisher figshare collection journal article supplement (https://tandf.figshare.com/ndownloader/files/39646638)
Supplement: Supplementary file 1 [file 39646638]

|  |  | **Supplementary Material** | | |  |  |  |  |
| --- | --- | --- | --- | --- | --- | --- | --- | --- |
| **Word** | **Age of Acquisition** | **Banajee et al. (2003)** | **Beukelman et al. (1989)** | **Erickson et al. (2019)** | **Fried-Oken & More (1992)** | **Marvin et al. (1994)** | **Quick et al. (2019)** | **Trembath et al. (2007)** |
| ah | 6 |  |  |  |  | X |  | X |
| hah | 6 |  |  |  |  |  |  | X |
| huh | 6 |  |  |  |  | X |  |  |
| ya | 6 |  |  |  |  | X |  |  |
| good-bye | 9 |  |  |  | X |  |  |  |
| oow | 9 |  |  |  |  |  |  | X |
| dad | 12 |  | X |  | X |  |  | X |
| daddy | 12 |  |  |  |  |  | X |  |
| mommy | 12 |  | X |  |  | X | X |  |
| bye | 14 |  |  |  |  | X |  | X |
| ant | 15 |  |  |  |  | X |  |  |
| ball | 15 |  | X |  | X | X | X | X |
| bell | 15 |  | X |  |  |  |  |  |
| cut | 15 |  | X |  |  | X |  |  |
| dog | 15 |  | X |  | X | X |  |  |
| hi | 15 |  |  |  | X | X |  |  |
| leaves | 15 |  |  |  |  | X |  |  |
| nah | 15 |  |  |  |  |  |  | X |
| no | 15 | X | X |  | X | X | X | X |
| oops | 15 |  |  |  |  |  | X |  |
| sand | 15 |  | X |  |  |  |  | X |
| **Word** | **Age of Acquisition** | **Banajee et al. (2003)** | **Beukelman et al. (1989)** | **Erickson et al. (2019)** | **Fried-Oken & More (1992)** | **Marvin et al. (1994)** | **Quick et al. (2019)** | **Trembath et al. (2007)** |
| stuck | 15 |  |  |  |  |  |  | X |
| yummy | 15 |  |  |  |  |  |  | X |
| baby | 16 |  | X |  | X | X | X | X |
| book | 16 |  |  |  | X |  | X | X |
| cracker | 17 |  | X |  |  |  |  |  |
| duck | 17 |  |  |  |  | X |  |  |
| hot | 17 |  |  |  | X | X |  |  |
| I'll | 17 |  |  |  |  |  | X |  |
| I'm | 17 |  |  |  |  |  | X |  |
| juice | 17 |  | X |  | X | X | X |  |
| shoe | 17 |  | X |  | X |  |  | X |
| yum | 17 |  |  |  |  |  | X | X |
| apple | 18 |  |  |  |  |  |  | X |
| bath | 18 |  |  |  | X |  |  |  |
| bear | 18 |  |  |  |  |  | X |  |
| bird | 18 |  |  |  |  | X |  |  |
| boo | 18 |  | X |  |  |  |  |  |
| bottle | 18 |  |  |  |  |  | X |  |
| car | 18 |  | X |  | X | X | X | X |
| cat | 18 |  | X |  | X |  |  |  |
| cookie | 18 |  |  |  | X | X |  |  |
| doing | 18 |  | X |  |  | X | X | X |
| **Word** | **Age of Acquisition** | **Banajee et al. (2003)** | **Beukelman et al. (1989)** | **Erickson et al. (2019)** | **Fried-Oken & More (1992)** | **Marvin et al. (1994)** | **Quick et al. (2019)** | **Trembath et al. (2007)** |
| eye | 18 |  |  |  | X |  |  |  |
| feet | 18 |  | X |  |  |  | X |  |
| fish | 18 |  | X |  |  |  | X |  |
| grandma | 18 |  |  |  | X |  |  |  |
| grandpa | 18 |  |  |  | X |  |  |  |
| hat | 18 |  | X |  |  |  |  | X |
| hello | 18 |  |  |  |  | X | X | X |
| high | 18 |  |  |  |  | X |  |  |
| milk | 18 |  | X |  | X |  |  |  |
| music | 18 |  |  |  | X |  |  |  |
| name | 18 |  | X |  |  | X |  | X |
| nose | 18 |  |  |  |  |  | X |  |
| shhh | 18 |  |  |  |  |  |  | X |
| sung | 18 |  |  |  |  |  | X |  |
| thank-you | 18 |  |  |  | X |  | X |  |
| up | 18 |  | X | X | X | X | X | X |
| yes | 18 | X | X |  | X | X | X | X |
| cows | 19 |  | X |  |  |  |  |  |
| cup | 19 |  |  |  |  | X |  |  |
| diaper | 19 |  |  |  |  |  | X |  |
| down | 19 |  | X |  | X | X | X | X |
| eat | 19 |  | X |  | X | X | X | X |
| **Word** | **Age of Acquisition** | **Banajee et al. (2003)** | **Beukelman et al. (1989)** | **Erickson et al. (2019)** | **Fried-Oken & More (1992)** | **Marvin et al. (1994)** | **Quick et al. (2019)** | **Trembath et al. (2007)** |
| go | 19 | X | X | X | X | X | X | X |
| hair | 19 |  | X |  |  | X | X |  |
| mine | 19 | X | X |  | X | X | X | X |
| more | 19 | X | X | X | X | X | X | X |
| mouth | 19 |  |  |  |  |  | X |  |
| outside | 19 |  |  |  | X |  | X |  |
| please | 19 |  | X |  | X | X | X | X |
| spoon | 19 |  |  |  |  |  | X |  |
| water | 19 |  | X |  | X | X | X |  |
| bed | 20 |  |  |  | X | X |  |  |
| bunny | 20 |  |  |  |  |  | X |  |
| door | 20 |  | X |  | X | X | X |  |
| light | 20 |  | X |  |  |  |  |  |
| trees | 20 |  |  |  |  | X |  |  |
| boat | 21 |  | X |  |  |  |  |  |
| broke | 21 |  |  |  |  |  |  | X |
| bugs | 21 |  |  |  |  | X |  |  |
| chair | 21 |  | X |  | X | X | X |  |
| cold | 21 |  |  |  | X |  | X |  |
| drink | 21 |  |  |  | X | X | X | X |
| eating | 21 |  |  |  |  | X |  |  |
| finger | 21 |  |  |  |  | X |  |  |
| **Word** | **Age of Acquisition** | **Banajee et al. (2003)** | **Beukelman et al. (1989)** | **Erickson et al. (2019)** | **Fried-Oken & More (1992)** | **Marvin et al. (1994)** | **Quick et al. (2019)** | **Trembath et al. (2007)** |
| gone | 21 |  | X |  |  |  |  |  |
| hand | 21 |  | X |  | X | X | X | X |
| head | 21 |  |  |  | X | X | X | X |
| horse | 21 |  |  |  |  | X |  |  |
| kiss | 21 |  |  |  |  |  | X |  |
| oh | 21 |  | X |  |  | X | X | X |
| ok | 21 |  |  |  |  | X |  |  |
| paint | 21 |  | X |  |  | X |  |  |
| peanut | 21 |  | X |  |  |  |  |  |
| peanut-butter | 21 |  |  |  | X |  |  |  |
| potty | 21 |  |  |  | X |  |  |  |
| tape | 21 |  | X |  |  | X |  |  |
| teeth | 21 |  |  |  |  |  | X |  |
| toy | 21 |  |  |  | X |  | X |  |
| toys | 21 |  |  |  |  | X | X |  |
| turn | 21 |  | X | X | X | X | X | X |
| big | 22 |  | X |  | X | X | X | X |
| bite | 22 |  |  |  |  | X | X |  |
| blue | 22 |  | X |  |  | X | X |  |
| box | 22 |  |  |  |  | X |  |  |
| cake | 22 |  | X |  |  |  |  |  |
| cereal | 22 |  |  |  | X |  |  |  |
| **Word** | **Age of Acquisition** | **Banajee et al. (2003)** | **Beukelman et al. (1989)** | **Erickson et al. (2019)** | **Fried-Oken & More (1992)** | **Marvin et al. (1994)** | **Quick et al. (2019)** | **Trembath et al. (2007)** |
| coat | 22 |  |  |  | X |  |  |  |
| doll | 22 |  |  |  | X |  |  |  |
| eggs | 22 |  | X |  |  |  |  |  |
| foot | 22 |  | X |  |  | X | X |  |
| help | 22 | X | X | X | X | X | X | X |
| home | 22 |  | X |  | X | X |  | X |
| house | 22 |  | X |  | X | X |  | X |
| hug | 22 |  |  |  | X |  |  |  |
| jump | 22 |  |  |  |  | X |  | X |
| leg | 22 |  |  |  | X |  |  |  |
| legs | 22 |  | X |  |  |  |  |  |
| me | 22 |  | X |  | X | X | X | X |
| off | 22 | X | X |  | X | X | X | X |
| on | 22 | X | X | X | X | X | X | X |
| open | 22 |  | X | X | X | X | X | X |
| orange | 22 |  | X |  |  |  |  |  |
| out | 22 | X | X |  | X | X | X | X |
| pants | 22 |  |  |  | X |  |  |  |
| play | 22 |  | X |  | X | X | X | X |
| read | 22 |  |  |  | X |  | X |  |
| run | 22 |  |  |  |  | X |  | X |
| see | 22 |  | X |  | X | X | X | X |
| **Word** | **Age of Acquisition** | **Banajee et al. (2003)** | **Beukelman et al. (1989)** | **Erickson et al. (2019)** | **Fried-Oken & More (1992)** | **Marvin et al. (1994)** | **Quick et al. (2019)** | **Trembath et al. (2007)** |
| shirt | 22 |  |  |  | X |  |  |  |
| sleep | 22 |  |  |  | X |  |  |  |
| sock | 22 |  |  |  | X |  |  |  |
| stop | 22 |  | X | X | X | X | X | X |
| swing | 22 |  |  |  |  | X |  |  |
| train | 22 |  | X |  |  |  |  |  |
| TV | 22 |  |  |  | X |  |  |  |
| walk | 22 |  |  |  | X |  | X |  |
| bathroom | 23 |  |  |  | X | X |  |  |
| boy | 23 |  |  |  | X | X | X | X |
| candy | 23 |  |  |  |  | X |  |  |
| clap | 23 |  |  |  |  |  | X |  |
| face | 23 |  |  |  |  | X | X |  |
| fall | 23 |  | X |  |  | X | X |  |
| food | 23 |  | X |  | X |  | X |  |
| get | 23 |  | X | X | X | X | X | X |
| girl | 23 |  | X |  | X | X | X |  |
| kitchen | 23 |  |  |  | X |  |  |  |
| love | 23 |  |  |  | X |  | X |  |
| money | 23 |  | X |  |  |  |  |  |
| red | 23 |  | X |  |  | X |  |  |
| ride | 23 |  |  |  | X | X |  |  |
| **Word** | **Age of Acquisition** | **Banajee et al. (2003)** | **Beukelman et al. (1989)** | **Erickson et al. (2019)** | **Fried-Oken & More (1992)** | **Marvin et al. (1994)** | **Quick et al. (2019)** | **Trembath et al. (2007)** |
| school | 23 |  |  |  | X |  |  |  |
| store | 23 |  |  |  | X |  |  |  |
| table | 23 |  | X |  | X |  |  |  |
| tickle | 23 |  | X |  |  |  |  |  |
| turtles | 23 |  |  |  |  | X |  |  |
| wash | 23 |  | X |  | X |  | X | X |
| what | 23 | X | X | X | X | X | X | X |
| bad | 24 |  |  |  | X | X |  |  |
| bin | 24 |  |  |  |  |  |  | X |
| breakfast | 24 |  |  |  | X |  |  |  |
| butter | 24 |  | X |  |  |  |  |  |
| clean | 24 |  | X |  |  |  | X |  |
| close | 24 |  |  |  | X |  | X |  |
| dinner | 24 |  |  |  | X |  |  |  |
| drive | 24 |  |  |  | X |  |  |  |
| find | 24 |  | X |  |  | X | X | X |
| good | 24 |  | X | X | X | X | X | X |
| happy | 24 |  |  |  | X |  |  |  |
| hungry | 24 |  |  |  | X |  |  |  |
| hurt | 24 |  |  |  | X |  |  |  |
| I | 24 | X | X | X | X | X | X | X |
| in | 24 | X | X | X | X | X | X | X |
| **Word** | **Age of Acquisition** | **Banajee et al. (2003)** | **Beukelman et al. (1989)** | **Erickson et al. (2019)** | **Fried-Oken & More (1992)** | **Marvin et al. (1994)** | **Quick et al. (2019)** | **Trembath et al. (2007)** |
| kick | 24 |  |  |  |  |  |  | X |
| look | 24 |  | X | X | X | X | X | X |
| looks | 24 |  |  |  |  |  |  | X |
| lunch | 24 |  | X |  | X | X |  | X |
| mummy | 24 |  |  |  |  |  |  | X |
| my | 24 | X | X |  | X | X | X | X |
| naughty | 24 |  |  |  |  |  |  | X |
| pretty | 24 |  |  |  |  |  | X |  |
| push | 24 |  |  |  |  | X | X |  |
| push | 24 |  |  |  |  |  |  | X |
| sit | 24 |  | X |  | X | X | X | X |
| that | 24 | X | X | X | X | X | X | X |
| throw | 24 |  |  |  |  |  | X | X |
| top | 24 |  | X |  |  | X |  |  |
| work | 24 |  |  |  | X |  |  |  |
| yeah | 24 |  |  |  |  |  |  | X |
| yellow | 24 |  | X |  |  |  | X |  |
| you | 24 | X | X | X | X | X | X | X |
| do | 25 |  | X | X | X | X | X | X |
| here | 25 | X | X | X | X | X | X | X |
| little | 25 |  | X |  | X | X | X | X |
| nice | 25 |  |  |  |  | X | X |  |
| **Word** | **Age of Acquisition** | **Banajee et al. (2003)** | **Beukelman et al. (1989)** | **Erickson et al. (2019)** | **Fried-Oken & More (1992)** | **Marvin et al. (1994)** | **Quick et al. (2019)** | **Trembath et al. (2007)** |
| now | 25 |  | X |  | X |  | X | X |
| party | 25 |  | X |  |  |  |  |  |
| scissors | 25 |  | X |  |  |  |  |  |
| this | 25 |  | X |  | X | X | X | X |
| wanna | 25 |  |  |  | X |  |  | X |
| want | 25 | X | X | X | X | X | X | X |
| where | 25 |  | X | X | X | X | X | X |
| all | 26 |  | X | X | X | X | X | X |
| back | 26 |  | X |  | X | X | X | X |
| bring | 26 |  |  |  |  |  |  | X |
| brother | 26 |  |  |  | X |  |  | X |
| don't | 26 |  |  |  |  | X | X |  |
| garage | 26 |  |  |  | X |  |  |  |
| give | 26 |  | X |  | X | X | X | X |
| like | 26 |  | X | X | X | X | X | X |
| make | 26 |  | X | X | X | X | X | X |
| man | 26 |  |  |  |  | X | X | X |
| pull | 26 |  |  |  |  |  | X |  |
| put | 26 |  | X | X | X | X | X | X |
| sick | 26 |  |  |  | X |  |  |  |
| sister | 26 |  | X |  | X |  |  |  |
| some | 26 | X | X | X | X | X | X | X |
| **Word** | **Age of Acquisition** | **Banajee et al. (2003)** | **Beukelman et al. (1989)** | **Erickson et al. (2019)** | **Fried-Oken & More (1992)** | **Marvin et al. (1994)** | **Quick et al. (2019)** | **Trembath et al. (2007)** |
| stand | 26 |  |  |  |  |  | X |  |
| take | 26 |  | X |  | X |  | X | X |
| the | 26 | X | X |  | X | X | X | X |
| there | 26 |  | X |  | X | X | X | X |
| thirsty | 26 |  |  |  | X |  |  |  |
| tired | 26 |  |  |  | X |  |  |  |
| wait | 26 |  |  |  |  | X | X | X |
| watch | 26 |  | X |  | X | X | X | X |
| a | 27 | X | X |  | X |  | X |  |
| and | 27 |  | X |  | X | X | X | X |
| away | 27 |  | X |  | X | X | X | X |
| bean | 27 |  |  |  |  | X |  |  |
| can | 27 |  | X | X | X | X | X | X |
| can't | 27 |  |  |  |  |  | X |  |
| coming | 27 |  | X |  |  |  | X | X |
| having | 27 |  | X |  |  |  |  |  |
| it | 27 | X | X | X | X | X | X | X |
| it's | 27 |  |  |  |  |  | X |  |
| need | 27 |  | X |  | X | X | X | X |
| people | 27 |  |  |  | X | X | X | X |
| **Word** | **Age of Acquisition** | **Banajee et al. (2003)** | **Beukelman et al. (1989)** | **Erickson et al. (2019)** | **Fried-Oken & More (1992)** | **Marvin et al. (1994)** | **Quick et al. (2019)** | **Trembath et al. (2007)** |
| right | 27 |  | X |  | X | X | X | X |
| under | 27 |  |  |  | X |  |  |  |
| who | 27 |  | X | X | X | X | X | X |
| finish | 28 | X |  | X |  |  |  |  |
| finished | 28 |  |  |  |  |  |  | X |
| not | 28 |  | X | X | X | X | X | X |
| say | 28 |  |  |  |  | X | X | X |
| why | 28 |  | X | X | X | X | X | X |
| another | 29 |  | X |  |  | X | X |  |
| at | 29 |  | X |  | X | X | X | X |
| day | 29 |  |  |  |  | X |  |  |
| he | 29 |  | X | X | X | X | X | X |
| he's | 29 |  |  |  |  |  | X |  |
| show | 29 |  | X |  |  | X |  | X |
| teacher's | 29 |  |  |  |  |  |  | X |
| any | 30 |  | X |  |  | X | X |  |
| are | 30 |  | X |  | X | X | X | X |
| bit | 30 |  | X |  |  |  | X | X |
| farm | 30 |  | X |  |  |  |  |  |
| fire | 30 |  | X |  |  | X |  |  |
| have to | 30 |  |  |  |  |  | X |  |
| her | 30 |  | X |  | X | X | X | X |
| **Word** | **Age of Acquisition** | **Banajee et al. (2003)** | **Beukelman et al. (1989)** | **Erickson et al. (2019)** | **Fried-Oken & More (1992)** | **Marvin et al. (1994)** | **Quick et al. (2019)** | **Trembath et al. (2007)** |
| hide | 30 |  | X |  |  |  |  |  |
| his | 30 |  | X |  | X | X | X | X |
| how | 30 |  | X |  | X | X | X | X |
| old | 30 |  |  |  |  | X |  |  |
| other | 30 |  | X |  | X | X | X | X |
| roll | 30 |  |  |  |  |  |  | X |
| she | 30 |  | X | X | X | X | X | X |
| sorry | 30 |  |  |  |  |  | X |  |
| sorry | 30 |  |  |  |  |  |  | X |
| stand | 30 |  | X |  |  |  |  |  |
| today | 30 |  | X |  | X | X | X | X |
| we'll | 30 |  |  |  |  |  | X |  |
| we're | 30 |  |  |  |  |  | X |  |
| your | 30 |  | X |  | X | X | X | X |
| birthday | 33 |  | X |  |  |  |  |  |
| doctor | 33 |  |  |  |  | X |  |  |
| mum | 33 |  |  |  |  |  |  | X |
| corn | 39 |  |  |  |  | X |  |  |
| fly | 39 |  |  |  |  | X |  |  |
| found | 39 |  | X |  |  | X |  | X |
| going | 39 |  | X |  | X | X | X | X |
| honey | 39 |  |  |  |  |  | X |  |
| **Word** | **Age of Acquisition** | **Banajee et al. (2003)** | **Beukelman et al. (1989)** | **Erickson et al. (2019)** | **Fried-Oken & More (1992)** | **Marvin et al. (1994)** | **Quick et al. (2019)** | **Trembath et al. (2007)** |
| is | 39 | X | X |  | X | X | X | X |
| ready | 39 |  | X |  |  | X | X |  |
| spider | 39 |  | X |  |  |  |  | X |
| catch | 42 |  |  |  |  | X |  | X |
| dig | 42 |  |  |  |  |  |  | X |
| mad | 42 |  |  |  | X |  |  |  |
| messy | 42 |  |  |  |  | X |  |  |
| myself | 42 |  |  |  |  | X |  |  |
| Spiderman | 42 |  |  |  |  |  |  | X |
| story | 42 |  |  |  | X |  |  |  |
| trying | 42 |  | X |  |  | X | X |  |
| will | 42 |  | X |  | X |  | X | X |
| won't | 42 |  |  |  |  |  | X |  |
| yourself | 45 |  |  |  |  |  | X |  |
| fixed | 48 |  |  |  |  | X |  |  |
| getting | 48 |  |  |  |  | X | X |  |
| new | 48 |  | X |  |  | X |  | X |
| same | 48 |  |  | X |  | X |  |  |
| silly | 48 |  |  |  |  |  | X |  |
| too | 48 |  | X |  | X | X | X | X |
| two | 48 |  | X |  | X | X | X | X |
| color | 51 |  | X |  |  |  |  |  |
| **Word** | **Age of Acquisition** | **Banajee et al. (2003)** | **Beukelman et al. (1989)** | **Erickson et al. (2019)** | **Fried-Oken & More (1992)** | **Marvin et al. (1994)** | **Quick et al. (2019)** | **Trembath et al. (2007)** |
| didn't | 51 |  |  |  |  |  | X |  |
| has | 51 |  | X |  | X | X | X | X |
| come | 54 |  | X |  | X | X | X | X |
| could | 54 |  | X |  | X | X | X | X |
| gonna | 54 |  |  |  | X | X |  | X |
| hear | 54 |  |  |  |  | X | X |  |
| hey | 54 |  | X |  |  |  |  | X |
| leave | 54 |  |  |  |  |  |  | X |
| let | 54 |  | X |  |  | X | X | X |
| something | 54 |  | X |  | X | X | X | X |
| suppose | 54 |  | X |  |  |  |  |  |
| voice | 54 |  |  |  |  |  | X |  |
| woh | 54 |  |  |  |  |  |  | X |
| yours | 54 |  |  |  |  | X |  | X |
| alright | 57 |  |  |  |  |  | X |  |
| buy | 57 |  |  |  |  | X |  |  |
| playhouse | 57 |  | X |  |  |  |  |  |
| which | 57 |  |  |  |  | X |  | X |
| bigger | 60 |  |  |  |  |  |  | X |
| does | 60 |  | X |  | X | X | X | X |
| doesn't | 60 |  |  |  |  |  | X |  |
| else | 60 |  | X |  |  | X | X | X |
| **Word** | **Age of Acquisition** | **Banajee et al. (2003)** | **Beukelman et al. (1989)** | **Erickson et al. (2019)** | **Fried-Oken & More (1992)** | **Marvin et al. (1994)** | **Quick et al. (2019)** | **Trembath et al. (2007)** |
| game | 60 |  | X |  |  |  |  |  |
| isn't | 60 |  |  |  |  |  | X |  |
| looking | 60 |  |  |  |  | X | X |  |
| must | 60 |  |  |  |  | X |  |  |
| someone | 60 |  |  |  |  | X |  |  |
| being | 63 |  |  |  |  | X |  |  |
| bum | 63 |  |  |  |  |  |  | X |
| cool | 63 |  |  |  |  |  |  | X |
| different | 63 |  |  | X |  | X |  |  |
| keep | 63 |  |  |  |  |  |  | X |
| let's | 63 |  |  |  |  |  | X |  |
| stomp | 63 |  | X |  |  |  |  |  |
| their | 63 |  |  |  | X | X |  |  |
| them | 63 |  | X |  | X | X | X | X |
| think | 63 |  | X |  | X | X | X | X |
| try | 63 |  | X |  |  | X | X |  |
| when | 63 |  | X | X | X | X | X | X |
| everything | 66 |  |  |  |  | X |  |  |
| pick | 66 |  |  |  |  | X |  | X |
| seven | 66 |  |  |  |  |  |  | X |
| thing | 66 |  |  |  | X | X | X | X |
| whoa | 66 |  | X |  |  |  |  |  |
| **Word** | **Age of Acquisition** | **Banajee et al. (2003)** | **Beukelman et al. (1989)** | **Erickson et al. (2019)** | **Fried-Oken & More (1992)** | **Marvin et al. (1994)** | **Quick et al. (2019)** | **Trembath et al. (2007)** |
| also | 69 |  |  |  |  | X |  |  |
| before | 69 |  |  |  |  | X |  |  |
| call | 69 |  |  |  |  | X |  |  |
| made | 69 |  | X |  |  | X |  |  |
| making | 69 |  | X |  |  |  |  | X |
| minute | 69 |  |  |  |  |  | X |  |
| mom | 69 |  | X |  | X | X |  |  |
| most | 69 |  |  |  |  | X |  |  |
| over | 69 |  | X |  | X | X | X | X |
| step | 69 |  |  |  |  |  |  | X |
| these | 69 |  | X |  | X | X | X | X |
| they're | 69 |  |  |  |  |  | X |  |
| those | 69 |  | X |  | X | X | X | X |
| together | 69 |  |  |  |  | X |  |  |
| use | 69 |  | X |  |  | X |  |  |
| would | 69 |  |  |  |  | X | X |  |
| you're | 69 |  |  |  |  |  | X |  |
| about | 72 |  |  |  | X | X | X | X |
| birds | 72 |  |  |  |  | X |  |  |
| black | 72 |  | X |  |  | X |  |  |
| comes | 72 |  |  |  |  | X |  | X |
| great | 72 |  |  |  |  | X |  |  |
| **Word** | **Age of Acquisition** | **Banajee et al. (2003)** | **Beukelman et al. (1989)** | **Erickson et al. (2019)** | **Fried-Oken & More (1992)** | **Marvin et al. (1994)** | **Quick et al. (2019)** | **Trembath et al. (2007)** |
| had | 72 |  | X |  |  | X | X | X |
| kind | 72 |  |  |  |  | X |  |  |
| named | 72 |  |  |  |  | X |  |  |
| our | 72 |  | X |  | X | X |  | X |
| real | 72 |  | X |  |  |  |  |  |
| saw | 72 |  |  |  |  | X |  | X |
| stay | 72 |  | X |  | X |  |  | X |
| then | 72 |  | X |  | X | X | X | X |
| time | 72 |  | X |  | X | X | X | X |
| to | 72 |  | X |  | X | X | X | X |
| used | 72 |  |  |  |  | X |  |  |
| we | 72 |  | X |  | X | X | X | X |
| went | 72 |  | X |  | X | X | X | X |
| because | 75 |  | X |  | X | X | X | X |
| been | 75 |  |  |  |  |  |  | X |
| bet | 75 |  |  |  |  | X |  |  |
| by | 75 |  | X |  | X | X |  |  |
| did | 75 |  | X |  | X | X | X | X |
| even | 75 |  |  |  |  | X |  |  |
| everybody | 75 |  |  |  |  | X |  | X |
| first | 75 |  | X |  | X | X |  | X |
| five | 75 |  | X |  |  | X |  | X |
| **Word** | **Age of Acquisition** | **Banajee et al. (2003)** | **Beukelman et al. (1989)** | **Erickson et al. (2019)** | **Fried-Oken & More (1992)** | **Marvin et al. (1994)** | **Quick et al. (2019)** | **Trembath et al. (2007)** |
| funny | 75 |  |  |  |  |  | X | X |
| gotta | 75 |  |  |  |  |  |  | X |
| guy | 75 |  |  |  | X |  |  |  |
| hands | 75 |  | X |  |  | X | X |  |
| higher | 75 |  |  |  |  |  |  | X |
| into | 75 |  |  |  |  |  |  | X |
| lift | 75 |  |  |  |  | X |  |  |
| lot | 75 |  | X |  |  | X |  |  |
| may | 75 |  |  |  |  | X |  |  |
| maybe | 75 |  | X |  |  | X |  |  |
| mean | 75 |  |  |  |  | X |  |  |
| quick | 75 |  |  |  |  |  |  | X |
| said | 75 |  | X |  | X | X |  | X |
| seat | 75 |  |  |  |  |  |  | X |
| so | 75 |  | X |  | X | X | X | X |
| somebody | 75 |  |  |  |  | X |  |  |
| sure | 75 |  | X |  |  |  |  |  |
| they | 75 |  | X |  | X | X | X | X |
| threw | 75 |  |  |  |  | X |  |  |
| um | 75 |  |  |  |  | X |  | X |
| well | 75 |  |  |  |  | X | X | X |
| whole | 75 |  |  |  |  | X |  |  |
| **Word** | **Age of Acquisition** | **Banajee et al. (2003)** | **Beukelman et al. (1989)** | **Erickson et al. (2019)** | **Fried-Oken & More (1992)** | **Marvin et al. (1994)** | **Quick et al. (2019)** | **Trembath et al. (2007)** |
| whoops | 75 |  | X |  |  |  |  |  |
| yet | 75 |  | X |  |  | X |  |  |
| be | 78 |  | X |  | X | X | X | X |
| bottom | 78 |  |  |  |  |  |  | X |
| cause | 78 |  |  |  |  | X |  |  |
| fence | 78 |  | X |  |  |  |  |  |
| friend | 78 |  |  |  | X |  |  | X |
| from | 78 |  |  |  |  | X | X |  |
| gets | 78 |  |  |  |  | X |  |  |
| girls | 78 |  |  |  |  | X |  |  |
| glue | 78 |  | X |  |  |  |  |  |
| if | 78 |  |  |  | X | X | X | X |
| just | 78 |  | X |  | X | X | X | X |
| line | 78 |  | X |  |  |  |  |  |
| long | 78 |  |  |  |  | X |  |  |
| middle | 78 |  | X |  |  | X |  |  |
| move | 78 |  | X |  |  | X |  | X |
| only | 78 |  |  |  |  | X |  | X |
| ours | 78 |  |  |  |  | X |  |  |
| really | 78 |  |  |  |  | X | X |  |
| room | 78 |  | X |  | X | X |  |  |
| sad | 78 |  |  |  | X |  |  |  |
| **Word** | **Age of Acquisition** | **Banajee et al. (2003)** | **Beukelman et al. (1989)** | **Erickson et al. (2019)** | **Fried-Oken & More (1992)** | **Marvin et al. (1994)** | **Quick et al. (2019)** | **Trembath et al. (2007)** |
| somewhere | 78 |  |  |  |  | X |  |  |
| stuff | 78 |  |  |  |  | X | X |  |
| things | 78 |  | X |  |  | X | X |  |
| us | 78 |  | X |  | X | X |  | X |
| white | 78 |  | X |  |  |  |  |  |
| as | 81 |  |  |  |  | X |  | X |
| both | 81 |  |  |  |  | X |  |  |
| boys | 81 |  |  |  |  |  |  | X |
| fell | 81 |  |  |  |  |  |  | X |
| goes | 81 |  | X | X | X | X | X | X |
| got | 81 |  | X |  | X |  | X | X |
| have | 81 |  | X |  | X | X | X | X |
| hill | 81 |  |  |  |  | X |  |  |
| him | 81 |  | X |  | X | X | X | X |
| hold | 81 |  |  |  |  | X | X |  |
| hum | 81 |  |  |  |  | X |  |  |
| know | 81 |  | X |  | X | X | X | X |
| or | 81 |  | X |  |  | X | X |  |
| playing | 81 |  |  |  |  |  |  | X |
| should | 81 |  |  |  |  |  |  | X |
| sometimes | 81 |  |  |  |  | X |  |  |
| while | 81 |  |  |  |  | X |  |  |
| **Word** | **Age of Acquisition** | **Banajee et al. (2003)** | **Beukelman et al. (1989)** | **Erickson et al. (2019)** | **Fried-Oken & More (1992)** | **Marvin et al. (1994)** | **Quick et al. (2019)** | **Trembath et al. (2007)** |
| jumping | 84 |  |  |  |  | X |  |  |
| ones | 84 |  | X |  |  |  |  | X |
| side | 84 |  |  |  |  | X |  |  |
| with | 84 |  | X |  | X | X | X | X |
| never | 87 |  |  |  |  | X |  |  |
| okay | 87 |  | X |  | X |  | X | X |
| shut | 87 |  |  |  |  | X |  |  |
| three | 87 |  | X |  | X | X | X | X |
| am | 90 |  | X |  |  |  |  | X |
| after | 93 |  |  |  |  | X |  |  |
| again | 93 |  | X |  |  | X | X | X |
| almost | 93 |  | X |  |  | X |  |  |
| already | 93 |  | X |  |  | X |  |  |
| an | 93 |  | X |  |  | X |  |  |
| around | 93 |  |  |  | X | X | X | X |
| ate | 93 |  | X |  |  |  |  |  |
| beautiful | 93 |  |  |  |  |  |  | X |
| better | 93 |  |  |  |  | X | X | X |
| but | 93 |  | X |  | X | X | X | X |
| came | 93 |  | X |  |  | X |  |  |
| **Word** | **Age of Acquisition** | **Banajee et al. (2003)** | **Beukelman et al. (1989)** | **Erickson et al. (2019)** | **Fried-Oken & More (1992)** | **Marvin et al. (1994)** | **Quick et al. (2019)** | **Trembath et al. (2007)** |
| done | 93 |  | X |  | X | X | X | X |
| for | 93 |  | X |  | X | X | X | X |
| four | 93 |  | X |  |  |  | X | X |
| green | 93 |  | X |  |  | X | X | X |
| guys | 93 |  | X |  |  | X |  | X |
| hole | 93 |  |  |  |  |  |  | X |
| inside | 93 |  |  |  | X | X |  |  |
| jumped | 93 |  |  |  |  | X |  |  |
| last | 93 |  |  |  |  | X |  |  |
| many | 93 |  | X |  |  | X |  |  |
| much | 93 |  |  |  |  | X | X |  |
| next | 93 |  |  |  |  | X |  | X |
| of | 93 |  | X |  | X | X | X | X |
| one | 93 |  | X |  | X | X | X | X |
| piece | 93 |  |  |  |  | X |  |  |
| remember | 93 |  |  |  |  | X |  | X |
| still | 93 |  |  |  |  | X | X | X |
| tell | 93 |  | X |  |  | X | X | X |
| telling | 93 |  |  |  |  |  |  | X |
| than | 93 |  |  |  |  | X |  | X |
| thank | 93 |  | X |  |  |  |  |  |
| through | 93 |  |  |  |  | X |  |  |
| **Word** | **Age of Acquisition** | **Banajee et al. (2003)** | **Beukelman et al. (1989)** | **Erickson et al. (2019)** | **Fried-Oken & More (1992)** | **Marvin et al. (1994)** | **Quick et al. (2019)** | **Trembath et al. (2007)** |
| very | 93 |  |  |  |  | X | X | X |
| wanted | 93 |  |  |  |  | X |  |  |
| wants | 93 |  | X |  |  |  |  |  |
| was | 93 |  | X |  | X | X | X | X |
| way | 93 |  | X |  |  | X | X | X |
| were | 93 |  |  |  |  | X |  | X |
| yep | 93 |  |  |  |  |  |  | X |
